# Supplementary material for: Biotransformation of α-terpineol by Alternaria alternata
Source: PubMed Central journal article supplement — RSC Adv. 2020 Feb 11;10(11):6491–6. doi: 10.1039/c9ra08042b (PMC9049759; doi:10.1039/c9ra08042b), 2020-02-11
Supplement: RA-010-C9RA08042B-s001.pdf [file RA-010-C9RA08042B-s001.pdf]

## Supplementary Information

### Biotransformation of $\alpha$ -Terpineol by *Alternaria alternata*

Rui-Feng Mei<sup>†</sup>, Ya-Xian Shi<sup>†</sup>, Wei-He Duan, Hao Ding, Xiao-Ran Zhang, Le Cai<sup>\*</sup>, Zhong-Tao Ding<sup>\*</sup>

*Functional Molecules Analysis and Biotransformation Key Laboratory of Universities in Yunnan Province, School of Chemical Science and Technology, Yunnan University, Kunming 650091, P. R. China.*

---

E-mail: [ztding@ynu.edu.cn](mailto:ztding@ynu.edu.cn) (Zhong-Tao Ding)

E-mail: [caile@ynu.edu.cn](mailto:caile@ynu.edu.cn) (Le Cai)

## Contents

|                                                                                                          |    |
|----------------------------------------------------------------------------------------------------------|----|
| <b>Spectroscopic information:</b> .....                                                                  | 3  |
| <b>Figure S1.</b> standard working curve for compound <b>2</b> .....                                     | 4  |
| <b>Figure S2.</b> standard working curve for compound <b>3</b> .....                                     | 4  |
| <b>Figure S3.</b> <sup>1</sup> H NMR spectrum (400 MHz, MeOD) of compound <b>2</b> .....                 | 5  |
| <b>Figure S4.</b> <sup>13</sup> C NMR spectrum (100 MHz, MeOD) of compound <b>2</b> .....                | 5  |
| <b>Figure S5.</b> H-H COSY spectrum of compound <b>2</b> .....                                           | 6  |
| <b>Figure S6.</b> ROESY spectrum of compound <b>2</b> .....                                              | 6  |
| <b>Figure S7.</b> HMBC spectrum of compound <b>2</b> .....                                               | 7  |
| <b>Figure S8.</b> HSQC spectrum of compound <b>2</b> .....                                               | 7  |
| <b>Figure S9.</b> <sup>1</sup> H NMR spectrum (600 MHz, CDCl <sub>3</sub> ) of compound <b>3</b> .....   | 8  |
| <b>Figure S10.</b> <sup>13</sup> C NMR spectrum (150 MHz, CDCl <sub>3</sub> ) of compound <b>3</b> ..... | 8  |
| <b>Figure S11.</b> H-H COSY spectrum of compound <b>3</b> .....                                          | 9  |
| <b>Figure S12.</b> NOESY spectrum (400MHz, MeOD) of compound <b>3</b> .....                              | 9  |
| <b>Figure S13.</b> HMBC spectrum of compound <b>3</b> .....                                              | 10 |
| <b>Figure S14.</b> HSQC spectrum of compound <b>3</b> .....                                              | 10 |
| <b>Table S1.</b> NMR parameters of compound <b>2</b> .....                                               | 11 |
| <b>Table S2.</b> NMR parameters of compound <b>3</b> .....                                               | 12 |

### Spectroscopic information:

(-)-(R)-7-Hydroxy- $\alpha$ -terpineol (**2a**):  $[\alpha]_{25}^D -25.1$  (*c* 0.020, CHCl<sub>3</sub>); <sup>1</sup>H NMR (400 MHz, CDCl<sub>3</sub>)  $\delta$  1.19 (s, 3H, CH<sub>3</sub>), 1.24 (s, 3H, CH<sub>3</sub>), 1.24 (m, 1H, CH-H), 1.36 (m, 1H, CH-H), 1.52 (m, 1H, CH-H), 1.54 (m, 1H, CH), 1.55 (m, 1H, CH-H), 1.76 (m, 1H, CH-H), 2.05 (m, 1H, CH-H), 4.01 (t, 2H, *J* 12.0, CH<sub>2</sub>), 5.69 (m, 1H, CH); <sup>13</sup>C NMR (100 MHz, CDCl<sub>3</sub>)  $\delta$  23.7, 26.5, 26.7, 26.7, 27.5, 45.2, 67.2, 72.9, 122.6, 137.6; EIMS *m/z*, observed: 170; C<sub>10</sub>H<sub>18</sub>O<sub>2</sub> [M]<sup>+</sup> requires: 170.

(-)-4R-Oleuropeic acid (**2**):  $[\alpha]_{25}^D -38.9$  (*c* 0.020, MeOH); <sup>1</sup>H NMR (400 MHz, MeOD)  $\delta$  1.17 (s, 3H, CH<sub>3</sub>), 1.17 (s, 3H, CH<sub>3</sub>), 1.22 (m, 1H, CH-H), 1.53 (m, 1H, CH), 2.01 (m, 1H, CH-H), 2.02 (m, 1H, CH-H), 2.08 (m, 1H, CH-H), 2.34 (br d, 1H, *J* 16.0, CH), 2.48 (br d, 1H, *J* 16.0, CH-H), 6.98 (t, 1H, *J* 2.4, CH); <sup>13</sup>C NMR (100 MHz, MeOD)  $\delta$  24.6, 26.4, 26.4, 27.0, 28.5, 45.6, 72.9, 131.7, 140.8, 171.1; EIMS *m/z*, observed: 184; C<sub>10</sub>H<sub>16</sub>O<sub>3</sub> [M]<sup>+</sup> requires: 184.

(+)-(1S,2R,4R)-*p*-Menthane-1,2,8-triol (**3**):  $[\alpha]_{25}^D +16.3$  (*c* 0.020, CHCl<sub>3</sub>); <sup>1</sup>H NMR (600 MHz, CDCl<sub>3</sub>)  $\delta$  1.14 (s, 3H, CH<sub>3</sub>), 1.18 (s, 3H, CH<sub>3</sub>), 1.22 (s, 3H, CH<sub>3</sub>), 1.34 (td, 1H, *J* 8.0, 4.0, CH-H), 1.50 (t, 1H, *J* 3.6, CH-H), 1.54 (t, 1H, *J* 8.0, CH-H), 1.63 (tt, 1H, *J* 12.0, 6.0, CH), 1.75 (t, 1H, *J* 2.0, CH-H), 1.79 (m, 2H, CH<sub>2</sub>), 3.61 (brs, 1H, CH); <sup>13</sup>C NMR (150 MHz, CDCl<sub>3</sub>)  $\delta$  22.2, 26.7, 27.6, 27.8, 30.0, 33.7, 41.1, 71.0, 72.8, 74.1; EIMS *m/z*, observed: 188; C<sub>10</sub>H<sub>20</sub>O<sub>3</sub> [M]<sup>+</sup> requires: 188.

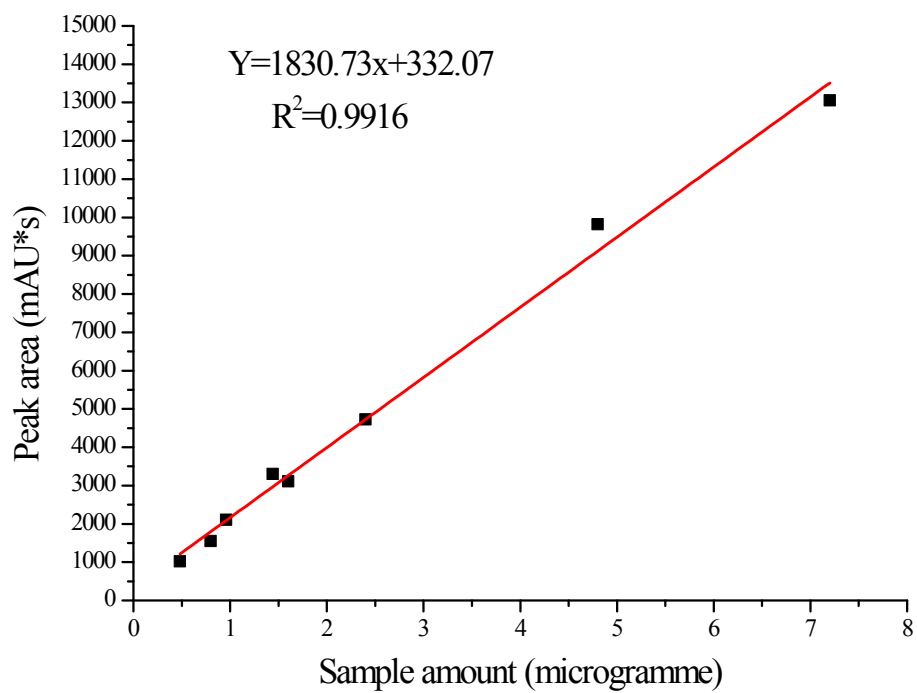

**Figure S1.** standard working curve for compound 2

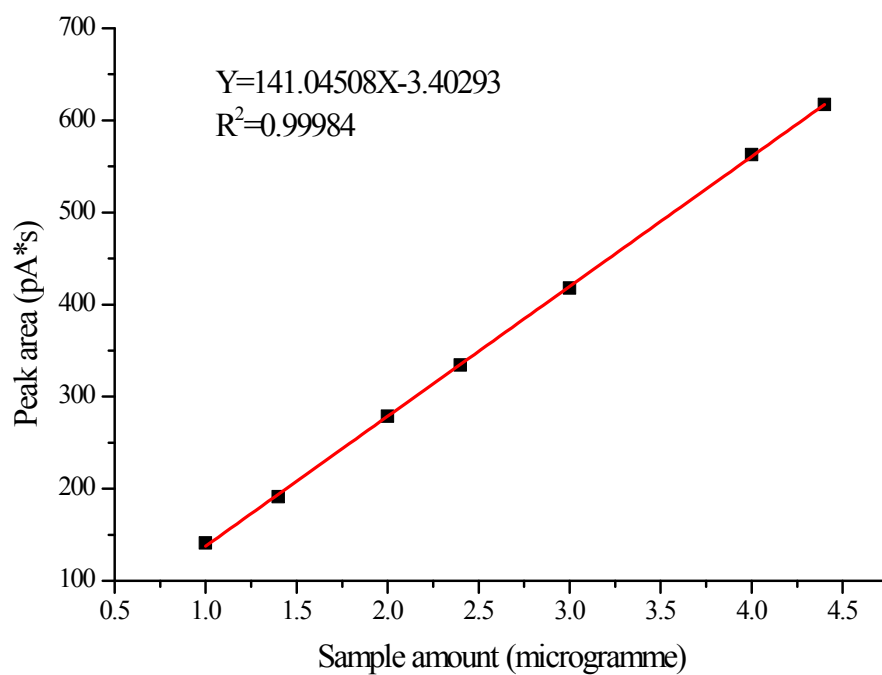

**Figure S2.** standard working curve for compound 3

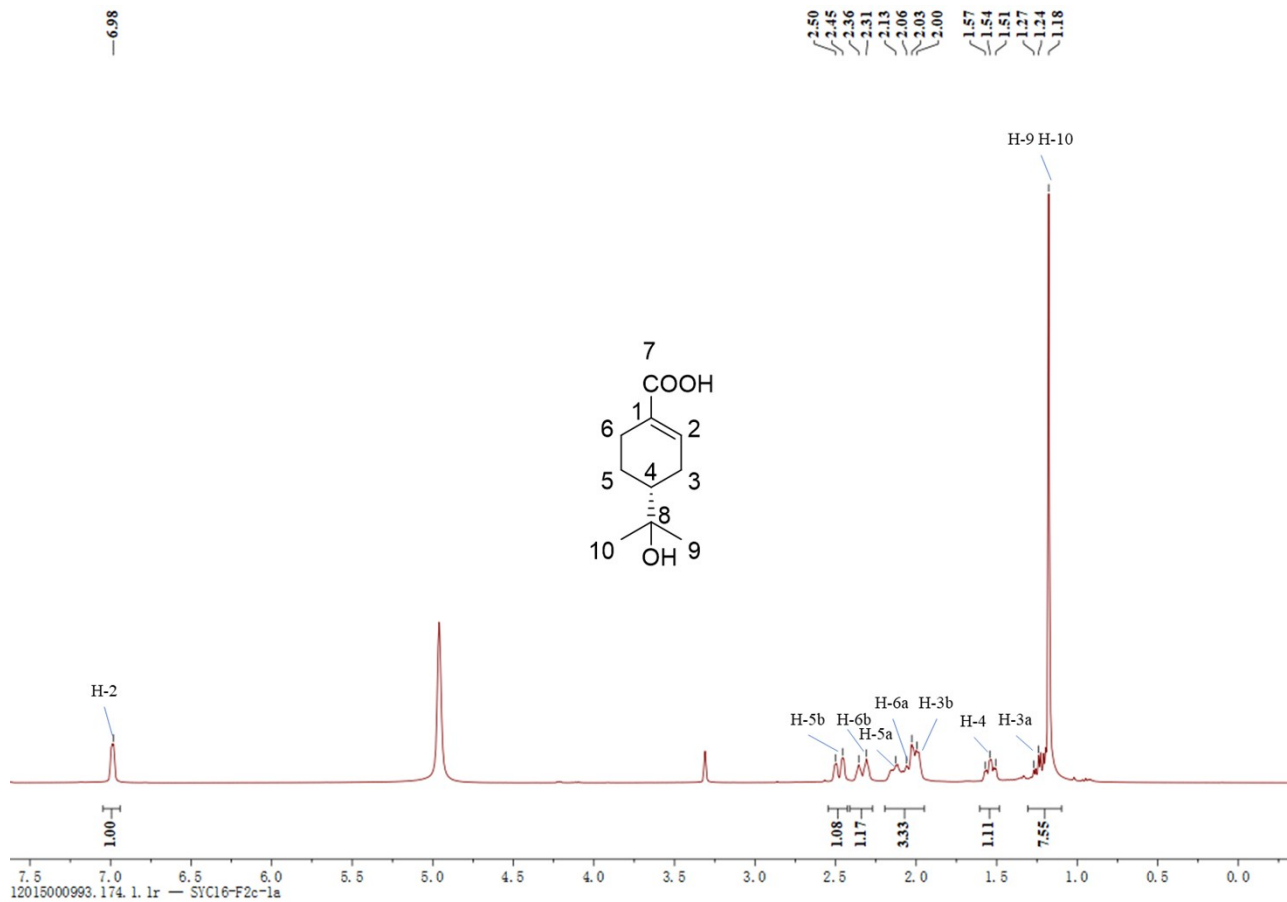

**Figure S3.**  $^1\text{H}$  NMR spectrum (400 MHz, MeOD) of compound **2**

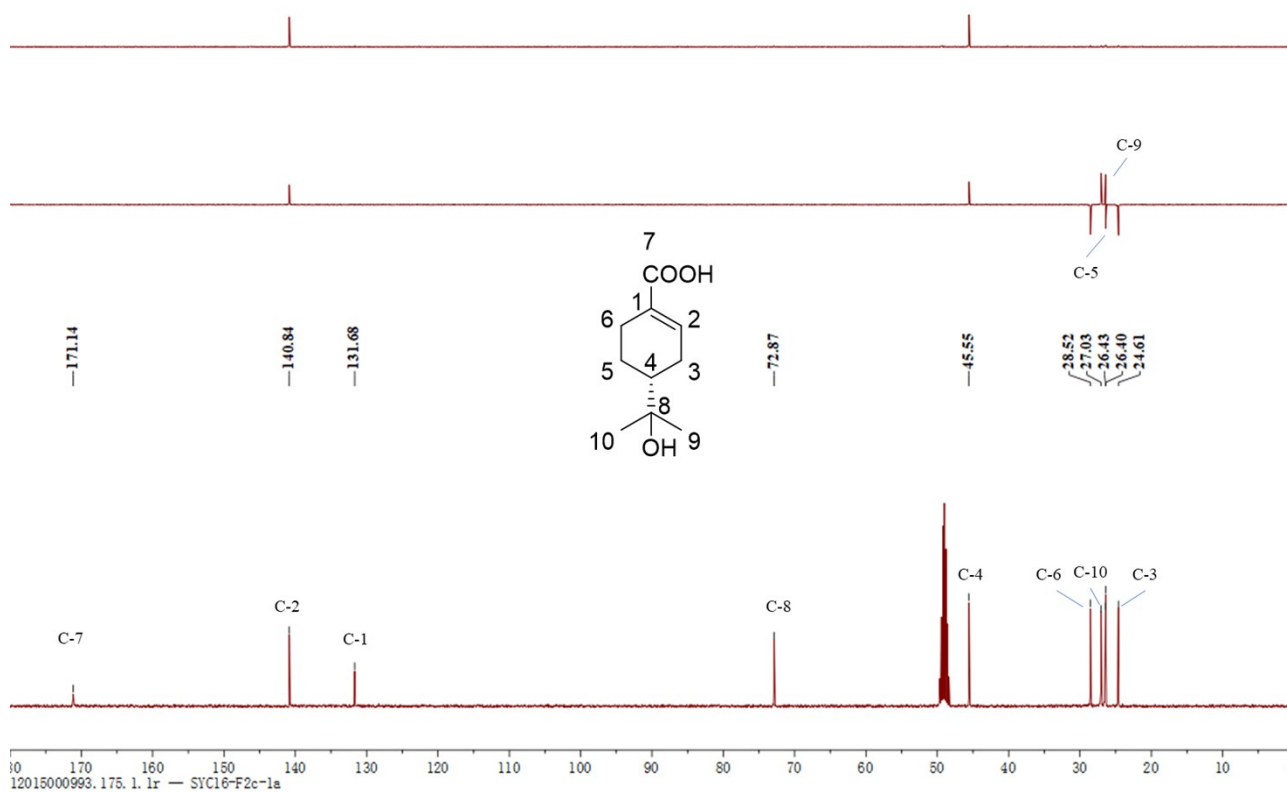

**Figure S4.**  $^{13}\text{C}$  NMR spectrum (100 MHz, MeOD) of compound **2**

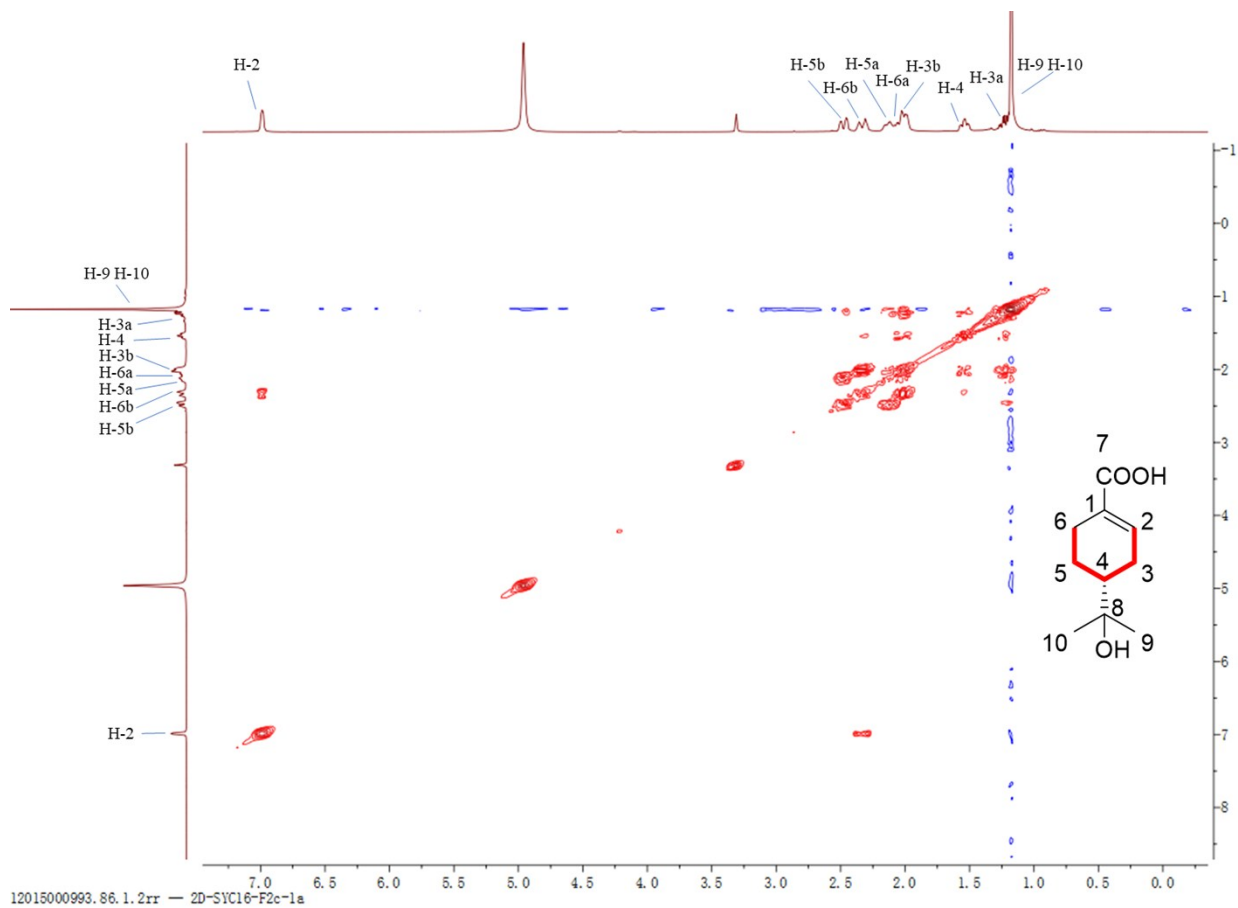

**Figure S5.** H-H COSY spectrum of compound **2**

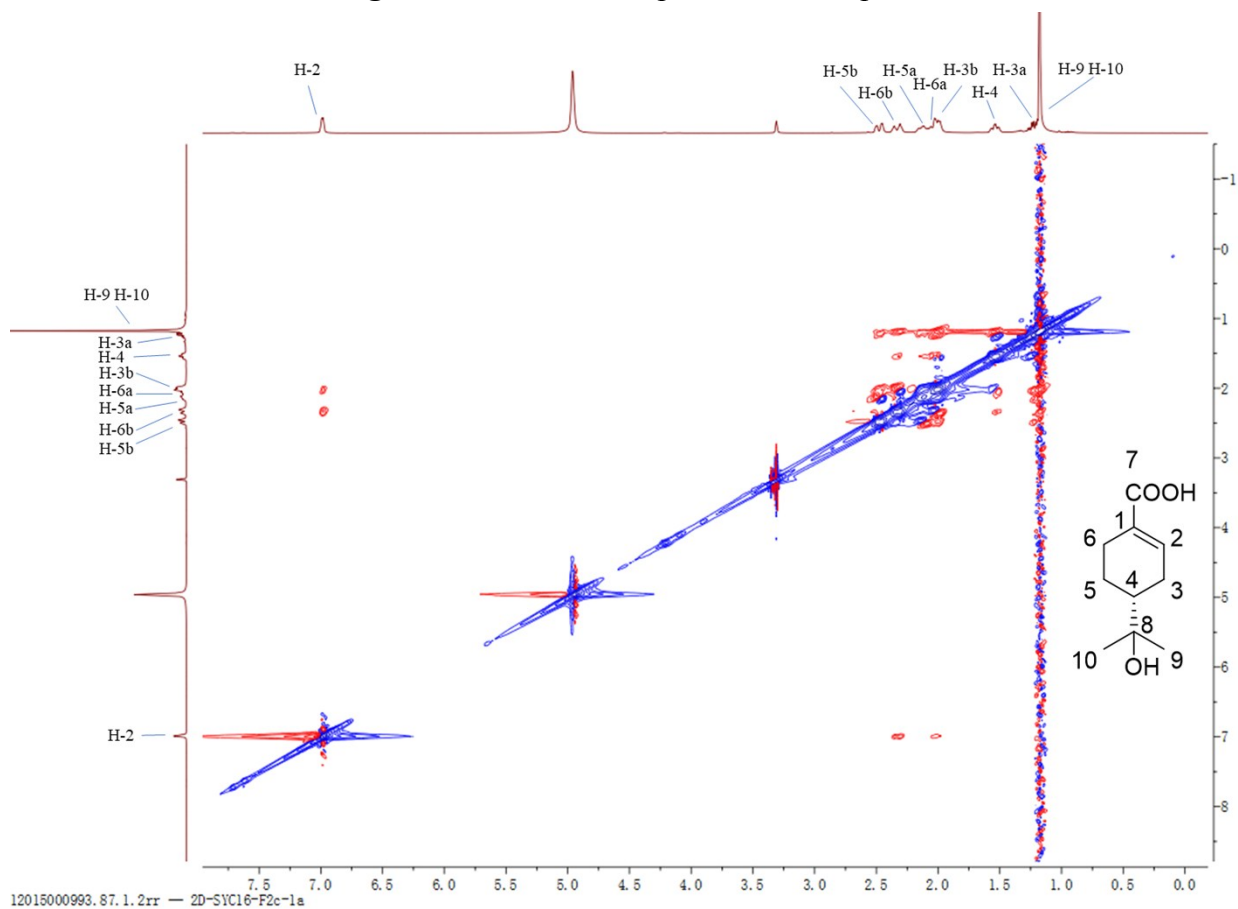

**Figure S6.** ROESY spectrum of compound **2**

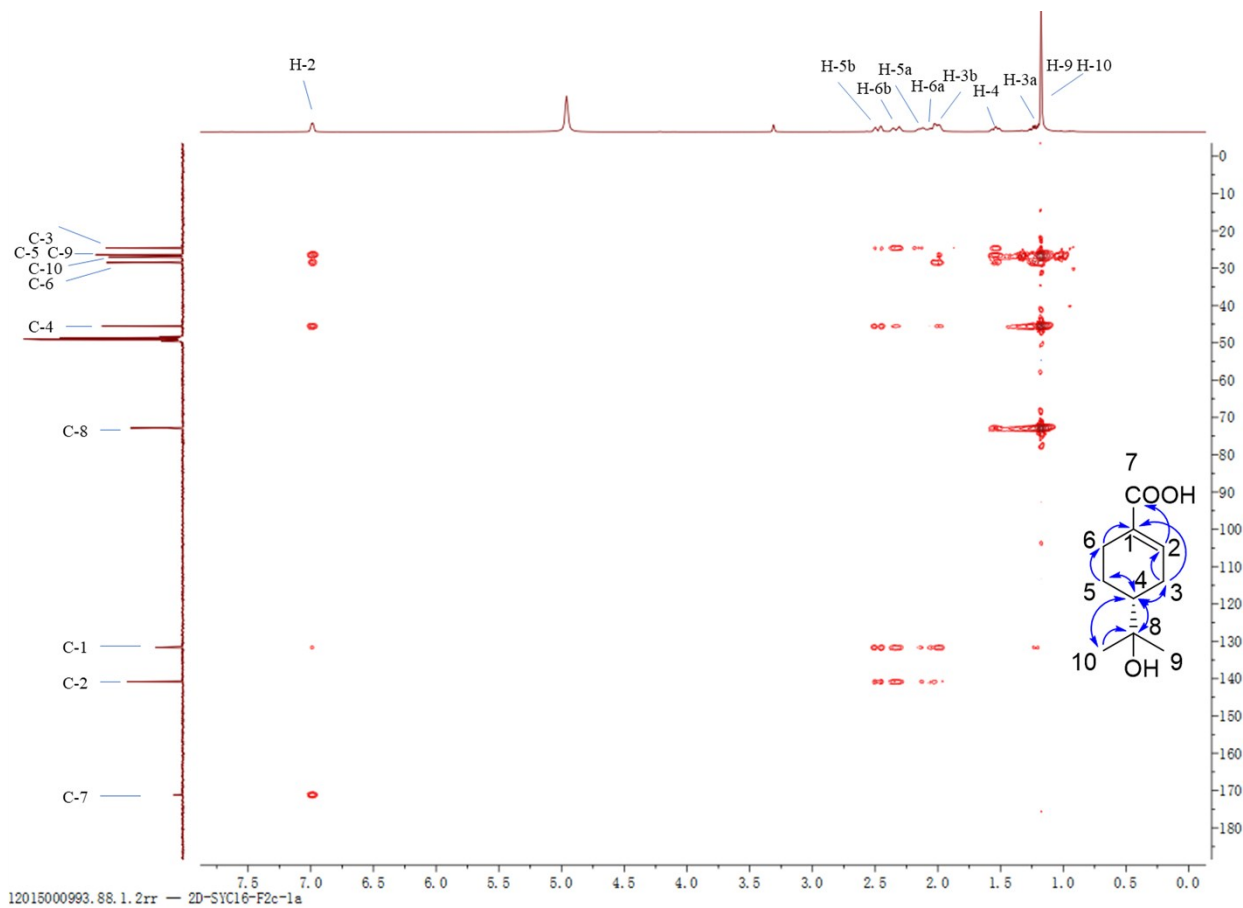

**Figure S7.** HMBC spectrum of compound **2**

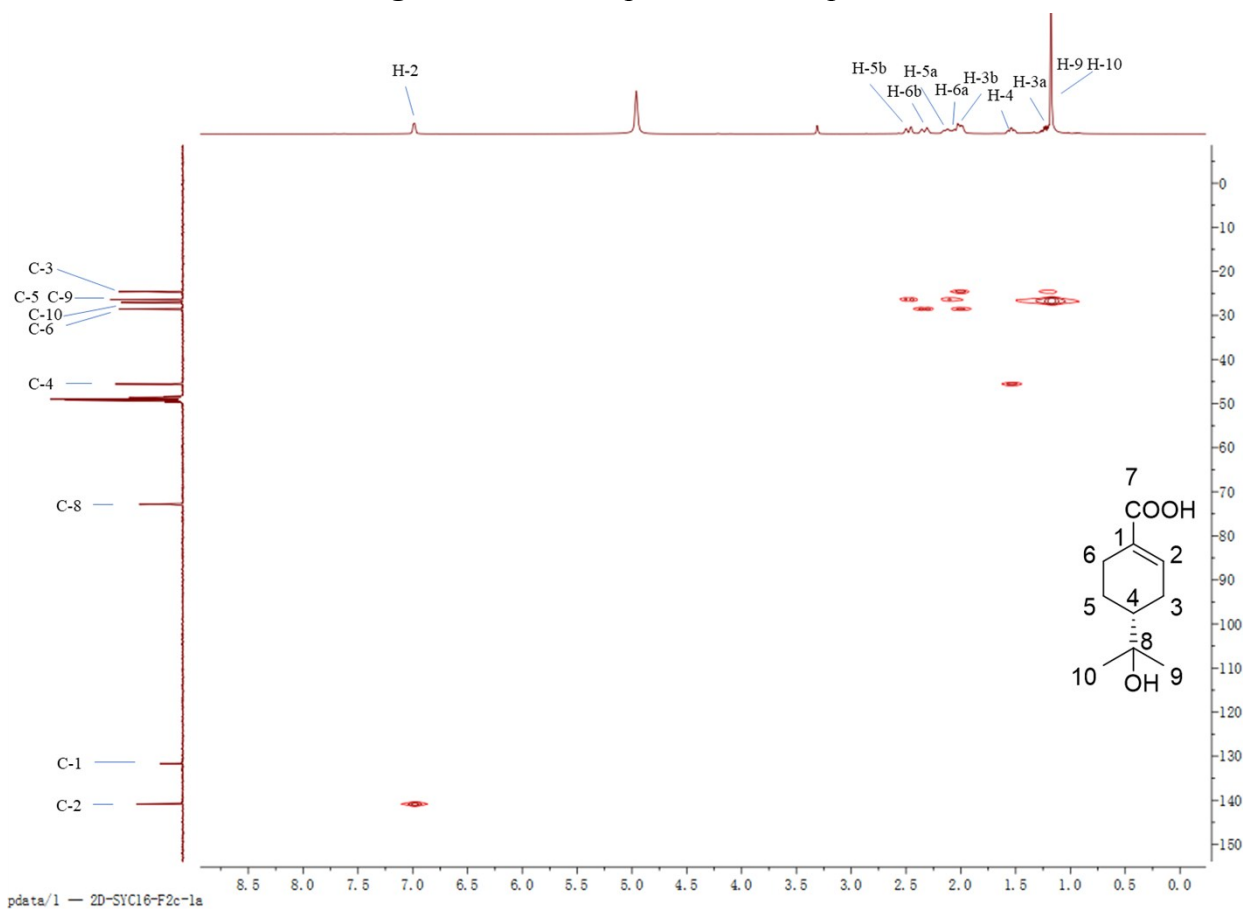

**Figure S8.** HSQC spectrum of compound **2**

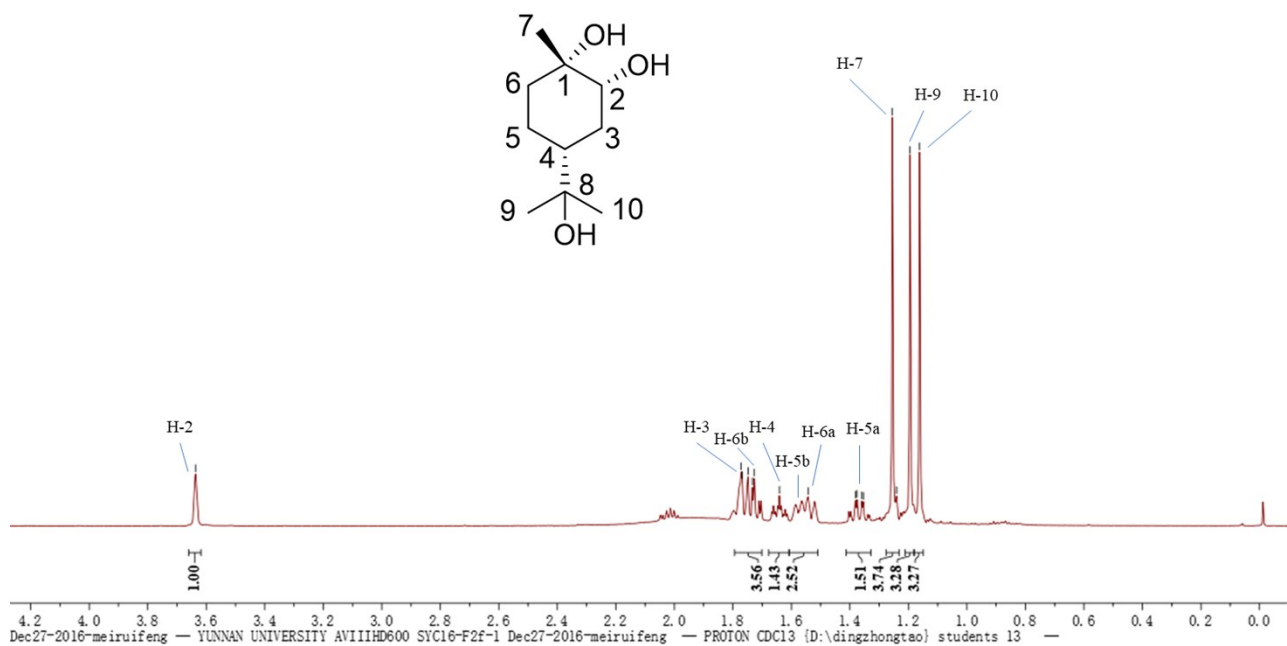

**Figure S9.** <sup>1</sup>H NMR spectrum (600 MHz, CDCl<sub>3</sub>) of compound **3**

 74.13  
 72.78  
 71.00

-41.05

-33.65

-29.99

-27.80

-27.61

-26.69

-22.26

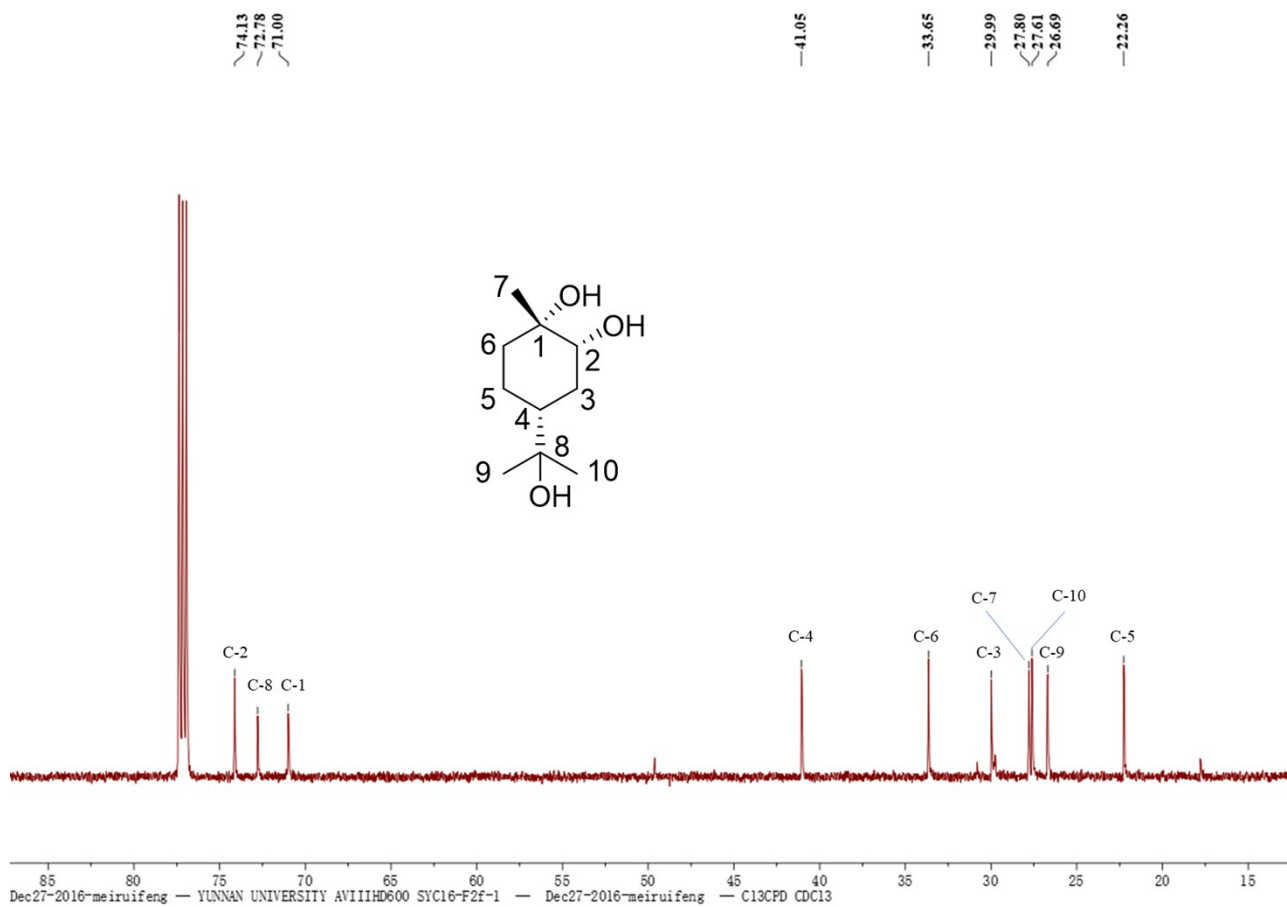

**Figure S10.** <sup>13</sup>C NMR spectrum (150 MHz, CDCl<sub>3</sub>) of compound **3**



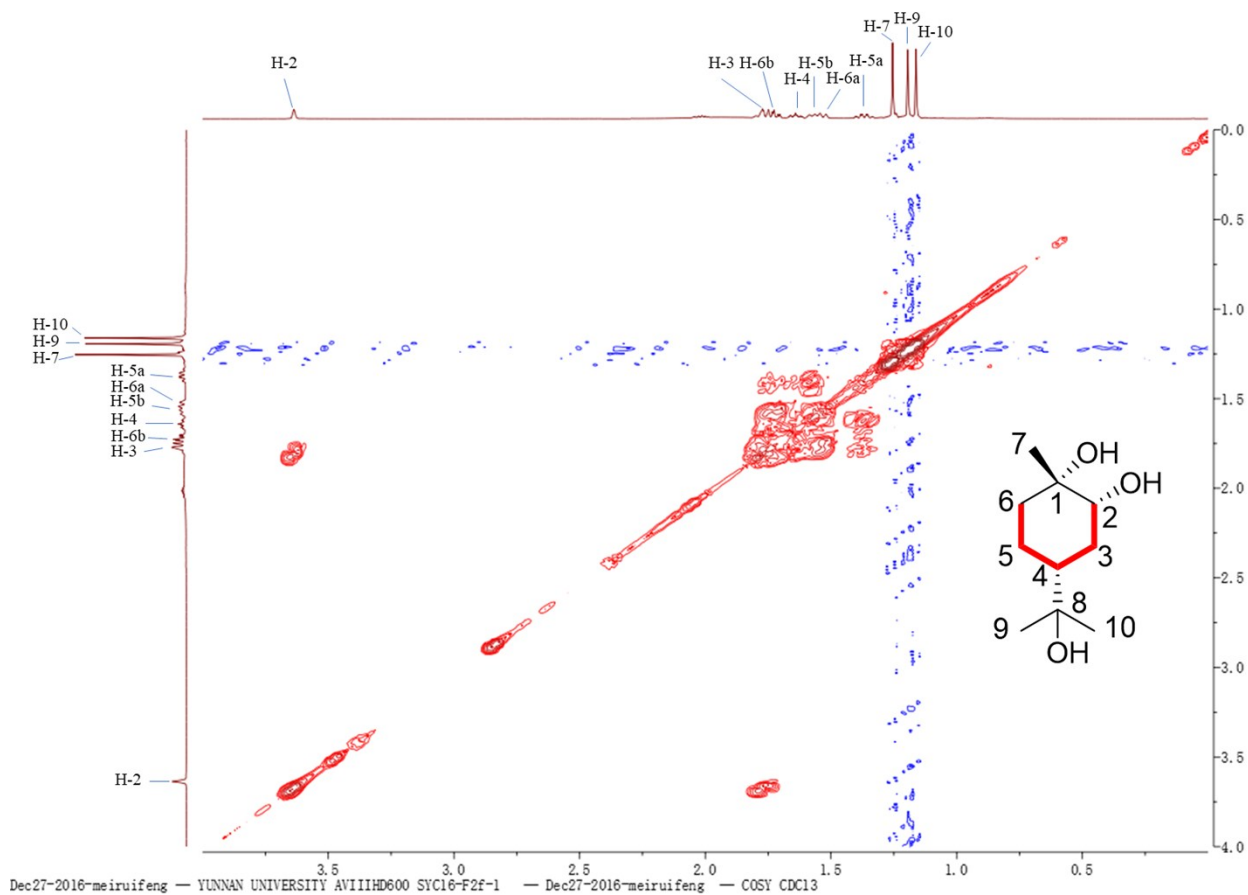

**Figure S11.** H-H COSY spectrum of compound **3**

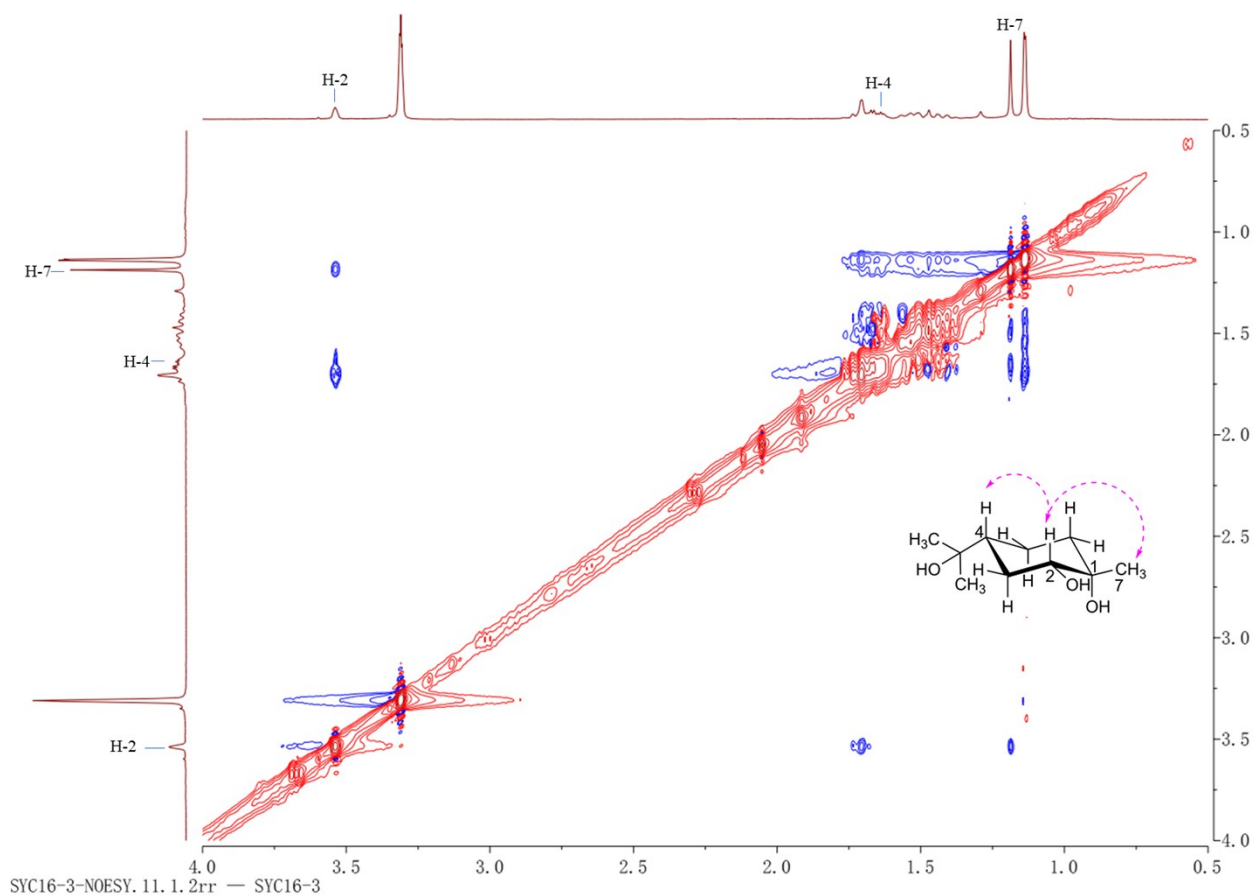

**Figure S12.** NOESY spectrum (400MHz, MeOD) of compound **3**

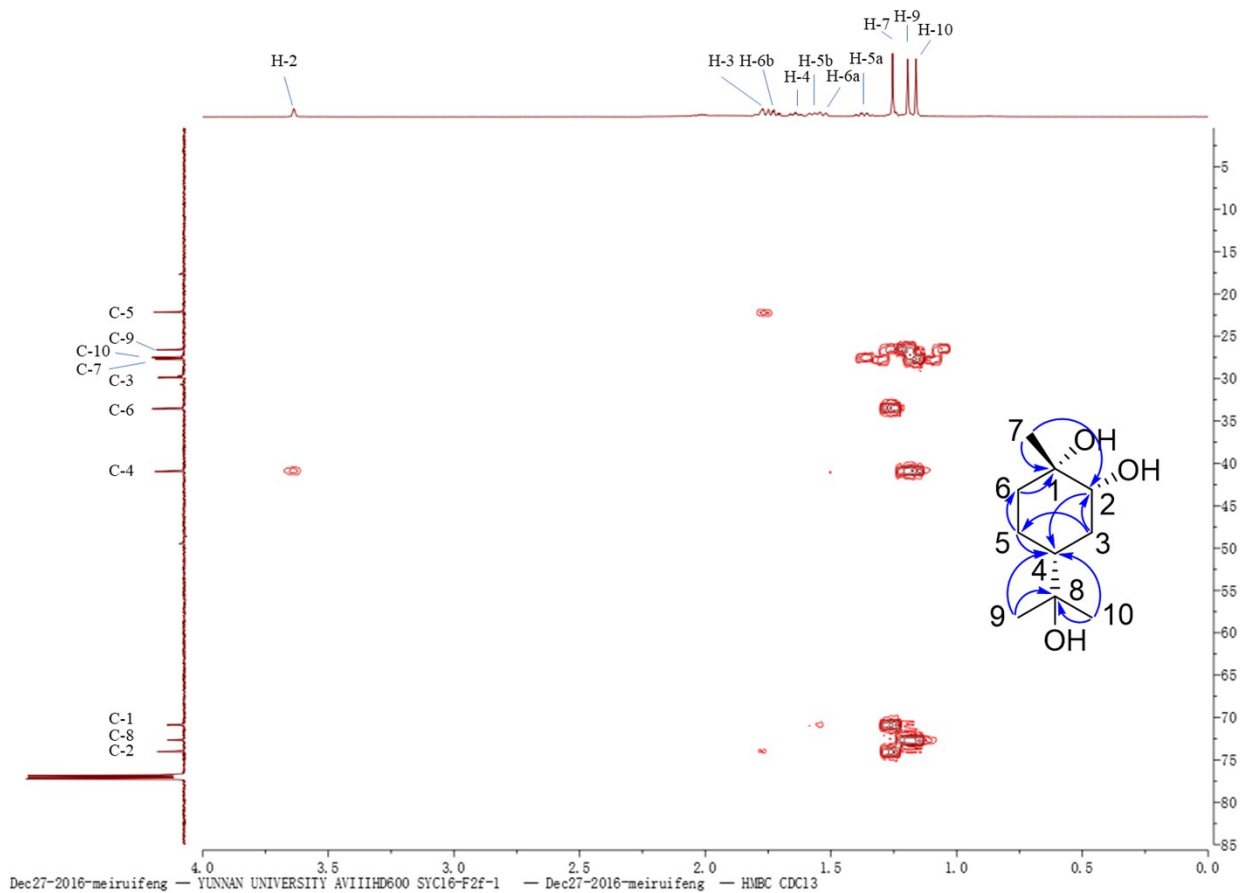

**Figure S13.** HMBC spectrum of compound **3**

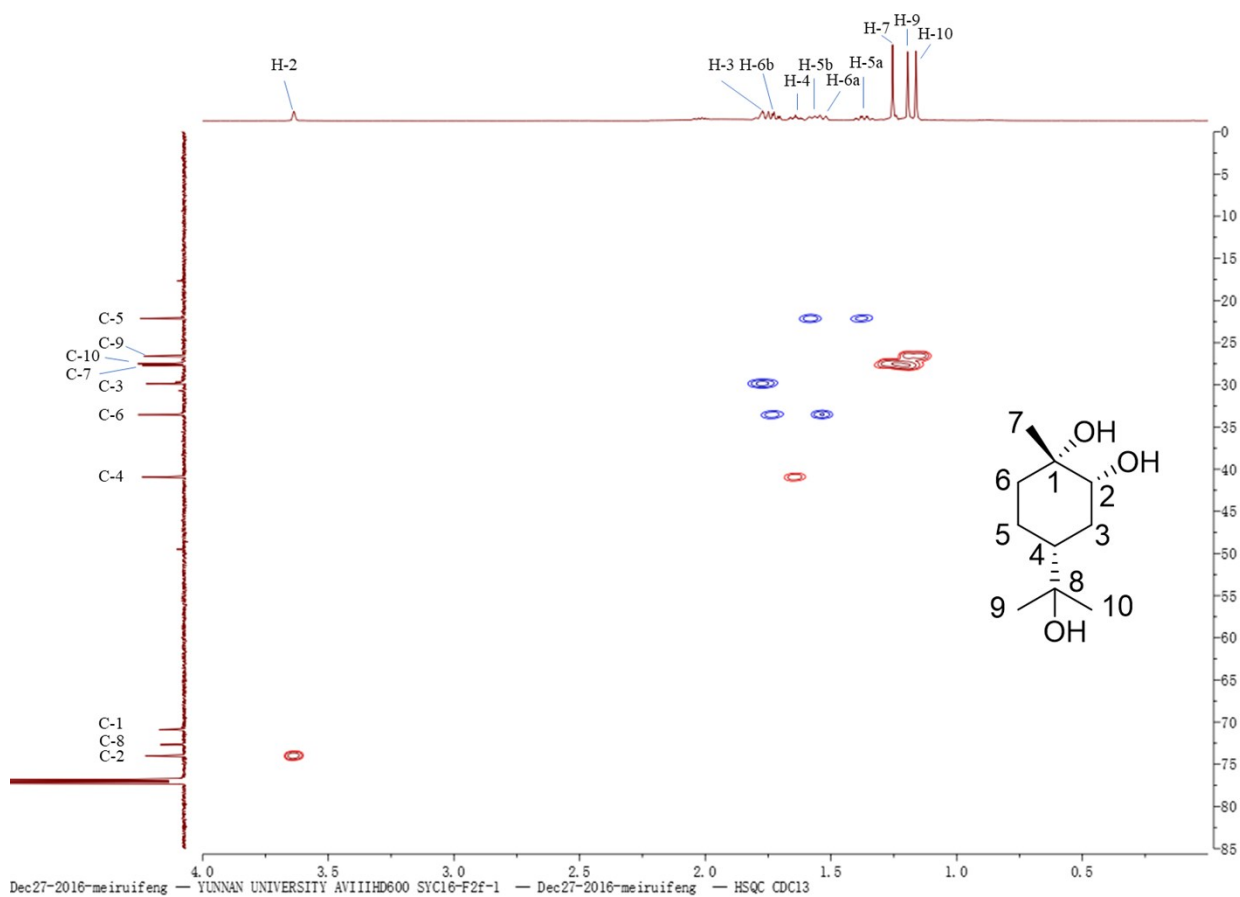

**Figure S14.** HSQC spectrum of compound **3**

**Table S1.** NMR parameters of compound **2**

| □                      | <sup>1</sup> H                                      | <sup>13</sup> C                                     | COSY                                                | ROESY                                               | HMBC                                                | HSQC                                                |
|------------------------|-----------------------------------------------------|-----------------------------------------------------|-----------------------------------------------------|-----------------------------------------------------|-----------------------------------------------------|-----------------------------------------------------|
| Comment                | SYC16-F2c-1a                                        | SYC16-F2c-1a                                        | 2D-SYC16-F2c-1a                                     | 2D-SYC16-F2c-1a                                     | 2D-SYC16-F2c-1a                                     | 2D-SYC16-F2c-1a                                     |
| Origin                 | Bruker BioSpin GmbH                                 |
| Spectrometer           | spect                                               | spect                                               | spect                                               | spect                                               | spect                                               | spect                                               |
| Solvent                | MeOD                                                | MeOD                                                | MeOD                                                | MeOD                                                | MeOD                                                | MeOD                                                |
| Temperature            | 0                                                   | 0                                                   | 0                                                   | 0                                                   | 0                                                   | 0                                                   |
| Pulse Sequence         | zg30                                                | zpgp30                                              | cosygpppqf                                          | roesyphpp.2                                         | hmbcetgpl3nd                                        | hsqcedetgpsisp2.3                                   |
| Experiment             | 1D                                                  | 1D                                                  | COSY                                                | ROESY                                               | HMBC                                                | HSQC-EDITED                                         |
| Probe                  | 5 mm PABBO BB/ 19F-<br>1H/ D Z-GRD Z116098/<br>0088 | 5 mm PABBO BB/ 19F-<br>1H/ D Z-GRD Z116098/<br>0088 | 5 mm PABBO BB/ 19F-<br>1H/ D Z-GRD Z116098/<br>0088 | 5 mm PABBO BB/ 19F-<br>1H/ D Z-GRD Z116098/<br>0088 | 5 mm PABBO BB/ 19F-<br>1H/ D Z-GRD Z116098/<br>0088 | 5 mm PABBO BB/ 19F-<br>1H/ D Z-GRD Z116098/<br>0088 |
| Number of Scans        | 8                                                   | 512                                                 | 1                                                   | 4                                                   | 4                                                   | 8                                                   |
| Receiver Gain          | 32                                                  | 196                                                 | 16                                                  | 16                                                  | 196                                                 | 196                                                 |
| Relaxation Delay       | 1                                                   | 2                                                   | 1.9459                                              | 2.0123                                              | 1.9386                                              | 1.5                                                 |
| Pulse Width            | 10.62                                               | 10.56                                               | 10.62                                               | 10.62                                               | 10.62                                               | 10.62                                               |
| Acquisition Time       | 4.0895                                              | 1.2977                                              | 0.2458                                              | 0.2437                                              | 0.4874                                              | 0.0799                                              |
| Spectrometer Frequency | 400.15                                              | 100.62                                              | (400.15, 400.15)                                    | (400.15, 400.15)                                    | (400.15, 100.62)                                    | (400.15, 100.62)                                    |
| Spectral Width         | 8012.8                                              | 25252.5                                             | (4166.7, 4166.7)                                    | (4201.7, 4201.7)                                    | (4201.7, 22321.4)                                   | (6410.3, 16611.3)                                   |
| Lowest Frequency       | -1813.3                                             | -1922.9                                             | (-685.0, -686.4)                                    | (-698.0, -688.3)                                    | (-693.2, -840.9)                                    | (-1342.0, -989.6)                                   |
| Nucleus                | <sup>1</sup> H                                      | <sup>13</sup> C                                     | ( <sup>1</sup> H, <sup>1</sup> H)                   | ( <sup>1</sup> H, <sup>1</sup> H)                   | ( <sup>1</sup> H, <sup>13</sup> C)                  | ( <sup>1</sup> H, <sup>13</sup> C)                  |
| Acquired Size          | 32768                                               | 32768                                               | (1024, 128)                                         | (1024, 256)                                         | (2048, 256)                                         | (512, 256)                                          |
| Spectral Size          | 65536                                               | 32768                                               | (1024, 1024)                                        | (1024, 1024)                                        | (2048, 1024)                                        | (1024, 1024)                                        |

**Table S2.** NMR parameters of compound **3**

| □                         | <sup>1</sup> H                                 | <sup>13</sup> C                                | COSY                                           | ROESY                                          | HMBC                                           | HSQC                                           |
|---------------------------|------------------------------------------------|------------------------------------------------|------------------------------------------------|------------------------------------------------|------------------------------------------------|------------------------------------------------|
| Comment                   | SYC16-F2f-1                                    | SYC16-F2f-1                                    | SYC16-F2f-1                                    | SYC16-F2f-1                                    | SYC16-F2f-1                                    | SYC16-F2f-1                                    |
| Origin                    | Bruker BioSpin GmbH                            |
| Spectrometer              | spect                                          | spect                                          | spect                                          | spect                                          | spect                                          | spect                                          |
| Solvent                   | CDCl3                                          | CDCl3                                          | CDCl3                                          | CDCl3                                          | CDCl3                                          | CDCl3                                          |
| Temperature               | 292.1                                          | 294.5                                          | 294.3                                          | 293.5                                          | 293.9                                          | 295.2                                          |
| Pulse Sequence            | zg30                                           | zggp30                                         | cosygpppqf                                     | roesyphpp.2                                    | hmbcgpdpndqf                                   | hsqcedetgpsisp2.3                              |
| Experiment                | 1D                                             | 1D                                             | COSY                                           | ROESY                                          | HMBC                                           | HSQC-EDITED                                    |
| Probe                     | Z114607_0222 (PA BBO<br>600S3 BBF-H-D-05 Z SP) |
| Number of Scans           | 1                                              | 1024                                           | 3                                              | 8                                              | 6                                              | 4                                              |
| Receiver Gain             | 62                                             | 188                                            | 27                                             | 24                                             | 188                                            | 188                                            |
| Relaxation Delay          | 1                                              | 2                                              | 1.9488                                         | 1.9597                                         | 1.4488                                         | 2                                              |
| Pulse Width               | 10                                             | 12                                             | 10                                             | 10                                             | 10                                             | 10                                             |
| Acquisition Time          | 2.7263                                         | 0.9044                                         | 0.1823                                         | 0.1823                                         | 0.1823                                         | 0.1065                                         |
| Spectrometer<br>Frequency | 600.17                                         | 150.91                                         | (600.17, 600.17)                               | (600.17, 600.17)                               | (600.17, 150.91)                               | (600.17, 150.91)                               |
| Spectral Width            | 12019.2                                        | 36231.9                                        | (5618.0, 5618.0)                               | (5618.0, 5618.0)                               | (5618.0, 33112.6)                              | (9615.4, 27173.9)                              |
| Lowest Frequency          | -2318.6                                        | -3024.7                                        | (-594.9, -594.9)                               | (-594.9, -594.9)                               | (-597.1, 44.1)                                 | (-1998.9, -306.6)                              |
| Nucleus                   | <sup>1</sup> H                                 | <sup>13</sup> C                                | ( <sup>1</sup> H, <sup>1</sup> H)              | ( <sup>1</sup> H, <sup>1</sup> H)              | ( <sup>1</sup> H, <sup>13</sup> C)             | ( <sup>1</sup> H, <sup>13</sup> C)             |
| Acquired Size             | 32768                                          | 32768                                          | (1024, 256)                                    | (1024, 256)                                    | (1024, 256)                                    | (1024, 256)                                    |
| Spectral Size             | 65536                                          | 65536                                          | (1024, 1024)                                   | (1024, 1024)                                   | (2048, 1024)                                   | (1024, 1024)                                   |
